# Supplementary material for: Prediction of Non-Response to Neoadjuvant Chemoradiotherapy in Esophageal Cancer Patients with 18F-FDG PET Radiomics Based Machine Learning Classification
Source: MDPI journal article supplement (doi:10.3390/diagnostics12051070), 2022-04-24
Supplement: s1 [file s1]

**Supplementary Table S1**

| <b>Radiomic Feature</b>                       | <b>Reason to exclude</b> |
|-----------------------------------------------|--------------------------|
| joint_maximum_3D_comb                         | Not reproducible         |
| inverse_difference_normalised_3D_comb         | Not reproducible         |
| inverse_difference_moment_normalised_3D_comb  | Not reproducible         |
| cluster_shade_3D_comb                         | Not reproducible         |
| cluster_prominence_3D_comb                    | Not reproducible         |
| low_dependence_low_grey_level_emphasis_3D     | Not reproducible         |
| dependence_count_energy_3D                    | Not reproducible         |
| small_zone_low_grey_level_emphasis_3D         | Not reproducible         |
| small_zone_high_grey_level_emphasis_3D        | Not reproducible         |
| large_zone_low_grey_level_emphasis_3D         | Not reproducible         |
| grey_level_non_uniformity_normalised_GLSZM_3D | Not reproducible         |
| grey_level_variance_GLSZM_3D                  | Not reproducible         |
| small_distance_high_grey_level_emphasis_3D    | Not reproducible         |
| large_distance_low_grey_level_emphasis_3D     | Not reproducible         |
| grey_level_non_uniformity_normalised_DZM_3D   | Not reproducible         |
| grey_level_variance_3D                        | Not reproducible         |
| zone_size_entropy_DZM_3D                      | Not reproducible         |
| centre_of_mass_shift                          | Not reproducible         |
| quartile_coefficient_of_dispersion            | Not reproducible         |
| V10                                           | Not reproducible         |
| DV1090                                        | Not reproducible         |
| dependence_count_percentage_3D'               | Not reproducible         |
| approximate volume                            | Redundant                |
| surface area                                  | Redundant                |
| maximum 3D diameter                           | Redundant                |
| major axis length                             | Redundant                |
| minor axis length                             | Redundant                |
| least axis length                             | Redundant                |
| elongation                                    | Redundant                |
| flatness                                      | Redundant                |
| volume density AABF                           | Redundant                |
| Morans I index                                | Redundant                |
| Gearys C measure                              | Redundant                |
| skewness                                      | Redundant                |
| P90                                           | Redundant                |
| energy intensity                              | Redundant                |
| root mean square                              | Redundant                |
| V90                                           | Redundant                |
| I10                                           | Redundant                |
| AUIVHC                                        | Redundant                |
| joint entropy 3D comb                         | Redundant                |
| difference average 3D comb                    | Redundant                |
| difference variance 3D comb                   | Redundant                |

|                                                    |           |
|----------------------------------------------------|-----------|
| difference entropy 3D comb                         | Redundant |
| sum average 3D comb                                | Redundant |
| sum variance 3D comb                               | Redundant |
| sum entropy 3D comb                                | Redundant |
| contrast GLCM 3D comb                              | Redundant |
| inverse difference 3D comb                         | Redundant |
| inverse variance 3D comb                           | Redundant |
| autocorrelation 3D comb                            | Redundant |
| cluster tendency 3D comb                           | Redundant |
| first measure of information correlation 3D comb   | Redundant |
| second measure of information correlation 3D comb  | Redundant |
| short runs emphasis 3D comb                        | Redundant |
| long runs emphasis 3D comb                         | Redundant |
| low grey level run emphasis 3D comb                | Redundant |
| high grey level run emphasis 3D comb               | Redundant |
| short run low grey level emphasis 3D comb          | Redundant |
| short run high grey level emphasis 3D comb         | Redundant |
| long run low grey level emphasis 3D comb           | Redundant |
| long run high grey level emphasis 3D comb          | Redundant |
| grey level non uniformity normalised GLRLM 3D comb | Redundant |
| run length non uniformity normalised 3D comb       | Redundant |
| grey level variance GLRLM 3D comb                  | Redundant |
| run entropy 3D comb                                | Redundant |
| large zone emphasis 3D                             | Redundant |
| low grey level zone emphasis 3D                    | Redundant |
| high grey level zone emphasis 3D                   | Redundant |
| grey level non uniformity GLSZM 3D                 | Redundant |
| zone percentage 3D                                 | Redundant |
| zone size variance 3D                              | Redundant |
| zone size entropy 3D                               | Redundant |
| small distance emphasis 3D                         | Redundant |
| small distance low grey level emphasis 3D          | Redundant |
| grey level variance DZM 3D                         | Redundant |
| zone size variance DZM 3D                          | Redundant |
| busyness 3D                                        | Redundant |
| texture strength 3D                                | Redundant |
| high dependence emphasis 3D                        | Redundant |
| low grey level count emphasis 3D                   | Redundant |
| low dependence high grey level emphasis 3D         | Redundant |
| high dependence low grey level emphasis 3D         | Redundant |
| high dependence high grey level emphasis 3D        | Redundant |
| dependence count non uniformity 3D                 | Redundant |
| dependence count variance 3D                       | Redundant |
| dependence count entropy 3D                        | Redundant |

Supplementary table S1 displays the excluded vendor dependent and redundant features.

Abbreviations: GLSZM = gray level size zone matrix, DZM = zone distance entropy, GLRLM = grey-level run length matrix.
